# Supplementary material for: MYCN acts as a direct co-regulator of p53 in MYCN amplified neuroblastoma
Source: PubMed Central journal article supplement (PMC5945521; doi:10.18632/oncotarget.24859), 2018-04-17
Supplement: oncotarget-09-20323-s001.pdf [file oncotarget-09-20323-s001.pdf]

# MYCN acts as a direct co-regulator of p53 in MYCN amplified neuroblastoma

## SUPPLEMENTARY MATERIALS

p53 responsive Genes – MYCN high versus MYCN low

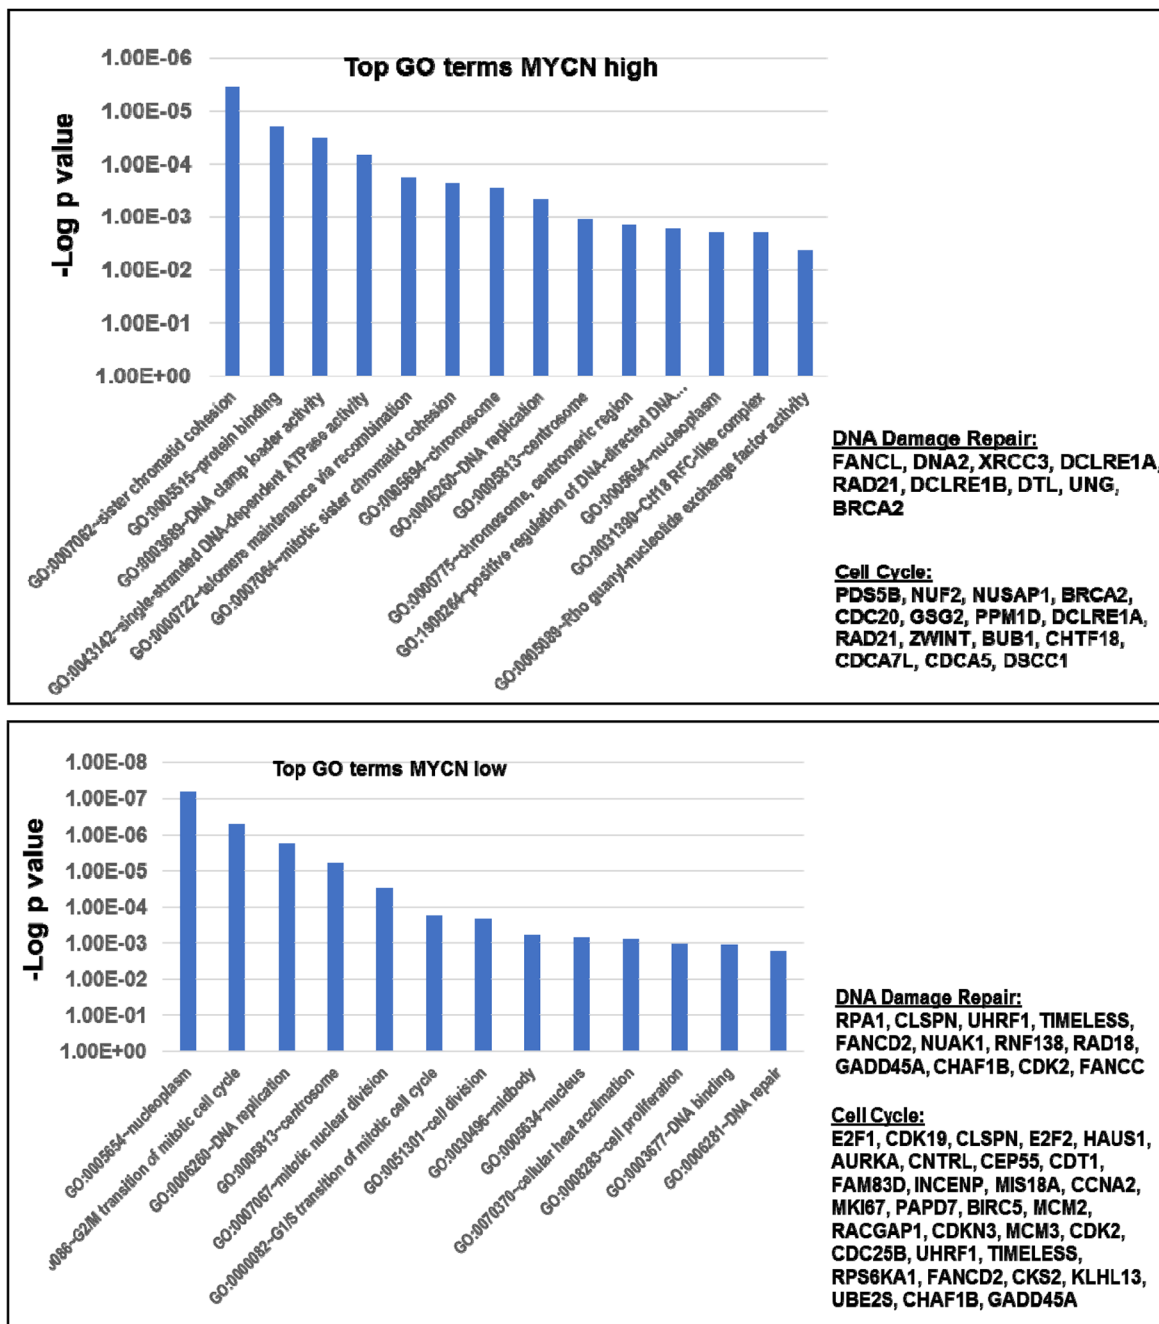

Supplementary Figure 1: Gene ontology analysis of p53 responsive genes comparing MYCN high versus MYCN Low groups to determine their functional grouping using the DAVID bioinformatics platform (<https://david.ncifcrf.gov/>).

## Functional annotations for p53 targets modulated by MYCN

| Functional annotation Term                        | PValue   | Bonferroni | FDR      |
|---------------------------------------------------|----------|------------|----------|
| GO:0007049~cell cycle                             | 3.57E-18 | 7.99E-16   | 4.56E-15 |
| GO:0000278~mitotic cell cycle                     | 2.96E-13 | 6.62E-11   | 3.77E-10 |
| GO:0005819~spindle                                | 4.15E-13 | 2.28E-11   | 4.08E-10 |
| GO:0015630~microtubule cytoskeleton               | 3.22E-12 | 1.77E-10   | 3.17E-09 |
| GO:0022403~cell cycle phase                       | 3.37E-11 | 7.55E-09   | 4.31E-08 |
| GO:0022402~cell cycle process                     | 4.29E-11 | 9.61E-09   | 5.48E-08 |
| GO:0000279~M phase                                | 9.16E-11 | 2.05E-08   | 1.17E-07 |
| GO:0044430~cytoskeletal part                      | 1.96E-09 | 1.08E-07   | 1.93E-06 |
| GO:0007067~mitosis                                | 2.53E-09 | 5.67E-07   | 3.23E-06 |
| GO:0000280~nuclear division                       | 2.53E-09 | 5.67E-07   | 3.23E-06 |
| GO:0000087~M phase of mitotic cell cycle          | 2.92E-09 | 6.54E-07   | 3.73E-06 |
| GO:0048285~organelle fission                      | 3.48E-09 | 7.78E-07   | 4.44E-06 |
| GO:0051301~cell division                          | 2.53E-08 | 5.66E-06   | 3.22E-05 |
| GO:0005856~cytoskeleton                           | 1.33E-07 | 7.31E-06   | 1.31E-04 |
| GO:0007017~microtubule-based process              | 1.94E-07 | 4.35E-05   | 2.48E-04 |
| GO:0043232~intracellular non-membrane-bounded org | 2.17E-07 | 1.19E-05   | 2.13E-04 |
| GO:0043228~non-membrane-bounded organelle         | 2.17E-07 | 1.19E-05   | 2.13E-04 |

| Cell cycle checkpoint |                                                 |
|-----------------------|-------------------------------------------------|
| ID                    | Gene Name                                       |
| BRIP1                 | BRCA1 interacting protein C-terminal helicase 1 |
| CHEK1                 | CHK1 checkpoint homolog (S. pombe)              |
| GTSE1                 | G-2 and S-phase expressed 1                     |
| TTK                   | TTK protein kinase                              |
| CDK1                  | cell division cycle 2, G1 to S and G2 to M      |
| CENPF                 | centromere protein F, 350/400ka (mitosin)       |
| CCNE2                 | cyclin E2                                       |

| Kinetochores |                                                 |
|--------------|-------------------------------------------------|
| ID           | Gene Name                                       |
| NDC80        | NDC80 homolog, kinetochore complex component    |
| NEK2         | NIMA (never in mitosis gene a)-related kinase 2 |
| CENPA        | centromere protein A                            |
| CENPF        | centromere protein F, 350/400ka (mitosin)       |
| SKA1         | chromosome 18 open reading frame 24             |
| KIF2C        | kinesin family member 2C                        |
| PLK1         | polo-like kinase 1 (Drosophila)                 |

| Protein Kinases |                                                 |
|-----------------|-------------------------------------------------|
| ID              | Gene Name                                       |
| CHEK1           | CHK1 checkpoint homolog (S. pombe)              |
| NEK2            | NIMA (never in mitosis gene a)-related kinase 2 |
| TTK             | TTK protein kinase                              |
| WEE1            | WEE1 homolog (S. pombe)                         |
| CDK1            | cell division cycle 2, G1 to S and G2 to M      |
| CDC7            | cell division cycle 7 homolog (S. cerevisiae)   |
| PLK1            | polo-like kinase 1 (Drosophila)                 |

| Cell Division |                                                              |
|---------------|--------------------------------------------------------------|
| ID            | Gene Name                                                    |
| NDC80         | NDC80 homolog, kinetochore complex component (S. cerevisiae) |
| NEK2          | NIMA (never in mitosis gene a)-related kinase 2              |
| WEE1          | WEE1 homolog (S. pombe)                                      |
| CDK1          | cell division cycle 2, G1 to S and G2 to M                   |
| CDC25A        | cell division cycle 25 homolog A (S. pombe)                  |
| CDC7          | cell division cycle 7 homolog (S. cerevisiae)                |
| CDCA2         | cell division cycle associated 2                             |
| CDCA8         | cell division cycle associated 8                             |
| CENPF         | centromere protein F, 350/400ka (mitosin)                    |
| SKA1          | chromosome 18 open reading frame 24                          |
| CCNB1         | cyclin B1                                                    |
| CCNB2         | cyclin B2                                                    |
| CCNE1         | cyclin E1                                                    |
| CCNE2         | cyclin E2                                                    |
| KIF11         | kinesin family member 11                                     |
| KIF23         | kinesin family member 23                                     |
| KIFC1         | kinesin family member C1                                     |
| NCAPG         | non-SMC condensin I complex, subunit G                       |
| PLK1          | polo-like kinase 1 (Drosophila)                              |

**Supplementary Figure 2: Details of functional annotations of p53 target genes regulation by p53 activation is dependent on MYCN status, highlighting cell cycle checkpoint, cell division and replication associated genes.**

## p53 activated genes exclusive to MYCN high context

| Functional annotation Term                        | PValue   | Bonferroni | FDR      |
|---------------------------------------------------|----------|------------|----------|
| GO:0007049~cell cycle                             | 3.57E-18 | 7.99E-16   | 4.56E-15 |
| GO:0000278~mitotic cell cycle                     | 2.96E-13 | 6.62E-11   | 3.77E-10 |
| GO:0005819~spindle                                | 4.15E-13 | 2.28E-11   | 4.08E-10 |
| GO:0015630~microtubule cytoskeleton               | 3.22E-12 | 1.77E-10   | 3.17E-09 |
| GO:0022403~cell cycle phase                       | 3.37E-11 | 7.55E-09   | 4.31E-08 |
| GO:0022402~cell cycle process                     | 4.29E-11 | 9.61E-09   | 5.48E-08 |
| GO:0000279~M phase                                | 9.16E-11 | 2.05E-08   | 1.17E-07 |
| GO:0044430~cytoskeletal part                      | 1.96E-09 | 1.08E-07   | 1.93E-06 |
| GO:0007067~mitosis                                | 2.53E-09 | 5.67E-07   | 3.23E-06 |
| GO:0000280~nuclear division                       | 2.53E-09 | 5.67E-07   | 3.23E-06 |
| GO:0000087~M phase of mitotic cell cycle          | 2.92E-09 | 6.54E-07   | 3.73E-06 |
| GO:0048285~organelle fission                      | 3.48E-09 | 7.78E-07   | 4.44E-06 |
| GO:0051301~cell division                          | 2.53E-08 | 5.66E-06   | 3.22E-05 |
| GO:0005856~cytoskeleton                           | 1.33E-07 | 7.31E-06   | 1.31E-04 |
| GO:0007017~microtubule-based process              | 1.94E-07 | 4.35E-05   | 2.48E-04 |
| GO:0043232~intracellular non-membrane-bounded org | 2.17E-07 | 1.19E-05   | 2.13E-04 |
| GO:0043228~non-membrane-bounded organelle         | 2.17E-07 | 1.19E-05   | 2.13E-04 |

| Cell cycle checkpoint |                                                 |
|-----------------------|-------------------------------------------------|
| ID                    | Gene Name                                       |
| BRIP1                 | BRCA1 interacting protein C-terminal helicase 1 |
| CHEK1                 | CHK1 checkpoint homolog (S. pombe)              |
| GTSE1                 | G-2 and S-phase expressed 1                     |
| TTK                   | TTK protein kinase                              |
| CDK1                  | cell division cycle 2, G1 to S and G2 to M      |
| CENPF                 | centromere protein F, 350/400ka (mitosin)       |
| CCNE2                 | cyclin E2                                       |

| Cell Division |                                                              |
|---------------|--------------------------------------------------------------|
| ID            | Gene Name                                                    |
| NDC80         | NDC80 homolog, kinetochore complex component (S. cerevisiae) |
| NEK2          | NIMA (never in mitosis gene a)-related kinase 2              |
| WEE1          | WEE1 homolog (S. pombe)                                      |
| CDK1          | cell division cycle 2, G1 to S and G2 to M                   |
| CDC25A        | cell division cycle 25 homolog A (S. pombe)                  |
| CDC7          | cell division cycle 7 homolog (S. cerevisiae)                |
| CDCA2         | cell division cycle associated 2                             |
| CDCA8         | cell division cycle associated 8                             |
| CENPF         | centromere protein F, 350/400ka (mitosin)                    |
| SKA1          | chromosome 18 open reading frame 24                          |
| CCNB1         | cyclin B1                                                    |
| CCNB2         | cyclin B2                                                    |
| CCNE1         | cyclin E1                                                    |
| CCNE2         | cyclin E2                                                    |
| KIF11         | kinesin family member 11                                     |
| KIF23         | kinesin family member 23                                     |
| KIFC1         | kinesin family member C1                                     |
| NCAPG         | non-SMC condensin I complex, subunit G                       |
| PLK1          | polo-like kinase 1 (Drosophila)                              |

| Kinetochore |                                                 |
|-------------|-------------------------------------------------|
| ID          | Gene Name                                       |
| NDC80       | NDC80 homolog, kinetochore complex component    |
| NEK2        | NIMA (never in mitosis gene a)-related kinase 2 |
| CENPA       | centromere protein A                            |
| CENPF       | centromere protein F, 350/400ka (mitosin)       |
| SKA1        | chromosome 18 open reading frame 24             |
| KIF2C       | kinesin family member 2C                        |
| PLK1        | polo-like kinase 1 (Drosophila)                 |

| Lipid Metabolism |                                                     |
|------------------|-----------------------------------------------------|
| ID               | Gene Name                                           |
| ARFGAP1          | ADP ribosylation factor GTPase activating protein 1 |
| EPS8L2           | EPS8 like 2                                         |
| ACER2            | alkaline ceramidase 2                               |
| DGKA             | diacylglycerol kinase alpha                         |
| DDR1             | discoidin domain receptor tyrosine kinase 1         |
| FITM2            | fat storage inducing transmembrane protein 2        |
| PLTP             | phospholipid transfer protein                       |

| Protein Kinases |                                                 |
|-----------------|-------------------------------------------------|
| ID              | Gene Name                                       |
| CHEK1           | CHK1 checkpoint homolog (S. pombe)              |
| NEK2            | NIMA (never in mitosis gene a)-related kinase 2 |
| TTK             | TTK protein kinase                              |
| WEE1            | WEE1 homolog (S. pombe)                         |
| CDK1            | cell division cycle 2, G1 to S and G2 to M      |
| CDC7            | cell division cycle 7 homolog (S. cerevisiae)   |
| PLK1            | polo-like kinase 1 (Drosophila)                 |

**Supplementary Figure 3: Transcriptional analysis by RNA-seq reveals genes modulated by p53 activation exclusively in the presence of MYCN.** Show is gene ontology and top enriched classes of genes that activated by p53 activation solely in the context of high MYCN levels.

p53 repressed genes – exclusive to MYCN high condition.

| Term                                          | PValue   | Bonferroni | FDR      |
|-----------------------------------------------|----------|------------|----------|
| GO:0006259~DNA metabolic process              | 5.88E-09 | 5.18E-06   | 9.14E-06 |
| GO:0051301~cell division                      | 1.93E-08 | 1.70E-05   | 3.00E-05 |
| GO:0005694~chromosome                         | 1.58E-07 | 2.64E-05   | 1.92E-04 |
| GO:0007059~chromosome segregation             | 5.16E-07 | 4.54E-04   | 8.02E-04 |
| GO:0000280~nuclear division                   | 7.23E-07 | 6.36E-04   | 1.12E-03 |
| GO:0007067~mitosis                            | 7.23E-07 | 6.36E-04   | 1.12E-03 |
| GO:0000087~M phase of mitotic cell cycle      | 8.53E-07 | 7.50E-04   | 1.33E-03 |
| GO:0006281~DNA repair                         | 9.47E-07 | 8.33E-04   | 1.47E-03 |
| GO:0048285~organelle fission                  | 1.04E-06 | 9.17E-04   | 1.62E-03 |
| GO:0006974~response to DNA damage stimulus    | 2.06E-06 | 1.81E-03   | 3.20E-03 |
| GO:0043232~intracellular non-membrane-bounded | 3.89E-06 | 6.50E-04   | 4.74E-03 |
| GO:0043228~non-membrane-bounded organelle     | 3.89E-06 | 6.50E-04   | 4.74E-03 |
| GO:0000279~M phase                            | 3.95E-06 | 3.47E-03   | 6.15E-03 |
| GO:0022403~cell cycle phase                   | 6.03E-06 | 5.29E-03   | 9.37E-03 |
| GO:0044427~chromosomal part                   | 1.10E-05 | 1.83E-03   | 1.34E-02 |
| GO:0000278~mitotic cell cycle                 | 1.20E-05 | 1.05E-02   | 1.87E-02 |
| GO:0006260~DNA replication                    | 1.75E-05 | 1.53E-02   | 2.72E-02 |
| GO:0022402~cell cycle process                 | 2.83E-05 | 2.46E-02   | 4.39E-02 |

| Cell Cycle |                                                                           |
|------------|---------------------------------------------------------------------------|
| ID         | Gene Name                                                                 |
| DCLRE1A    | DNA cross-link repair 1A (PSO2 homolog, <i>S. cerevisiae</i> )            |
| KIAA1009   | KIAA1009                                                                  |
| NUF2       | NUF2, NDC80 kinetochore complex component, homolog                        |
| PDS5B      | PDS5, regulator of cohesion maintenance, homolog B                        |
| rad21      | RAD21 homolog ( <i>S. pombe</i> )                                         |
| ZWINT      | ZW10 interactor                                                           |
| BRCA2      | breast cancer 2, early onset                                              |
| BUB1       | budding uninhibited by benzimidazoles 1 homolog (yeast)                   |
| CDC20      | cell division cycle 20 homolog ( <i>S. cerevisiae</i> )                   |
| CDCA5      | cell division cycle associated 5                                          |
| DSCC1      | defective in sister chromatid cohesion 1 homolog ( <i>S. cerevisiae</i> ) |
| ID4        | inhibitor of DNA binding 4, dominant negative helix-loop-helix            |
| NUSAP1     | nucleolar and spindle associated protein 1                                |

| Mitosis  |                                                                |
|----------|----------------------------------------------------------------|
| ID       | Gene Name                                                      |
| DCLRE1A  | DNA cross-link repair 1A (PSO2 homolog, <i>S. cerevisiae</i> ) |
| KIAA1009 | KIAA1009                                                       |
| NUF2     | NUF2, NDC80 kinetochore complex component, homolog             |
| PDS5B    | PDS5, regulator of cohesion maintenance, homolog B             |
| rad21    | RAD21 homolog ( <i>S. pombe</i> )                              |
| ZWINT    | ZW10 interactor                                                |
| BUB1     | budding uninhibited by benzimidazoles 1 homolog (yeast)        |
| CDC20    | cell division cycle 20 homolog ( <i>S. cerevisiae</i> )        |
| CDCA5    | cell division cycle associated 5                               |
| NUSAP1   | nucleolar and spindle associated protein 1                     |

| DNA Repair |                                                                |
|------------|----------------------------------------------------------------|
| ID         | Gene Name                                                      |
| DCLRE1A    | DNA cross-link repair 1A (PSO2 homolog, <i>S. cerevisiae</i> ) |
| DCLRE1B    | DNA cross-link repair 1B (PSO2 homolog, <i>S. cerevisiae</i> ) |
| DNA2       | DNA replication helicase 2 homolog (yeast)                     |
| FANCL      | Fanconi anemia, complementation group L                        |
| rad21      | RAD21 homolog ( <i>S. pombe</i> )                              |
| XRCC3      | X-ray repair complementing defective repair                    |
| ASTE1      | asteroid homolog 1 ( <i>Drosophila</i> )                       |
| BRCA2      | breast cancer 2, early onset                                   |
| C19orf40   | chromosome 19 open reading frame 40                            |
| RFC1       | replication factor C (activator 1) 1, 145kDa                   |
| RFC5       | replication factor C (activator 1) 5, 36.5kDa                  |
| UNG        | uracil-DNA glycosylase                                         |

**Supplementary Figure 4: Gene ontology and top enriched classes of genes repressed by p53 activation solely in the context of high MYCN levels.**



**A**

| Motif | MYCN-Low    | MYCN-High   | Motif Sequence |
|-------|-------------|-------------|----------------|
| MYCN  | $10^{-559}$ | $10^{-552}$ |                |
| MAX   | $10^{-527}$ | $10^{-515}$ |                |
| c-MYC | $10^{-416}$ | $10^{-407}$ |                |

**B**

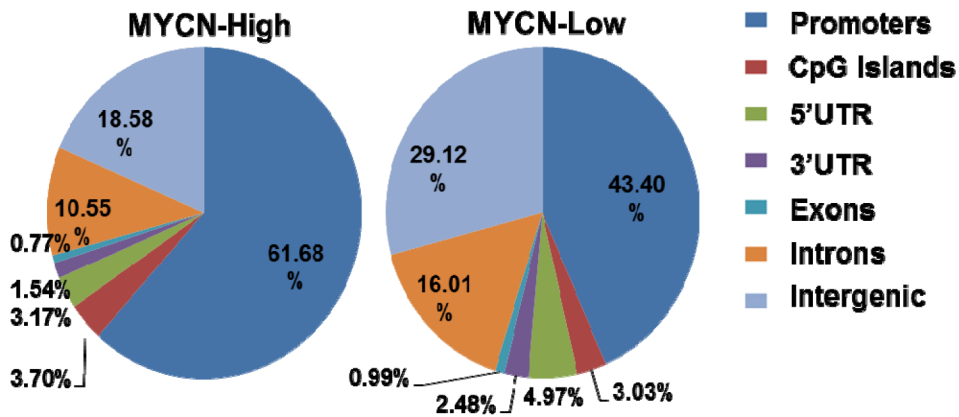

**Supplementary Figure 6:** (A) Motif analysis of the MYCN-ChIP-Seq data set showed that MYC and MAX were enriched at canonical E-boxes. (B) Distribution analysis of MYCN binding over genomic and epigenomic landmarks indicates increased binding at promoters and decreased binding at introns and intergenic regions in high MYCN conditions.



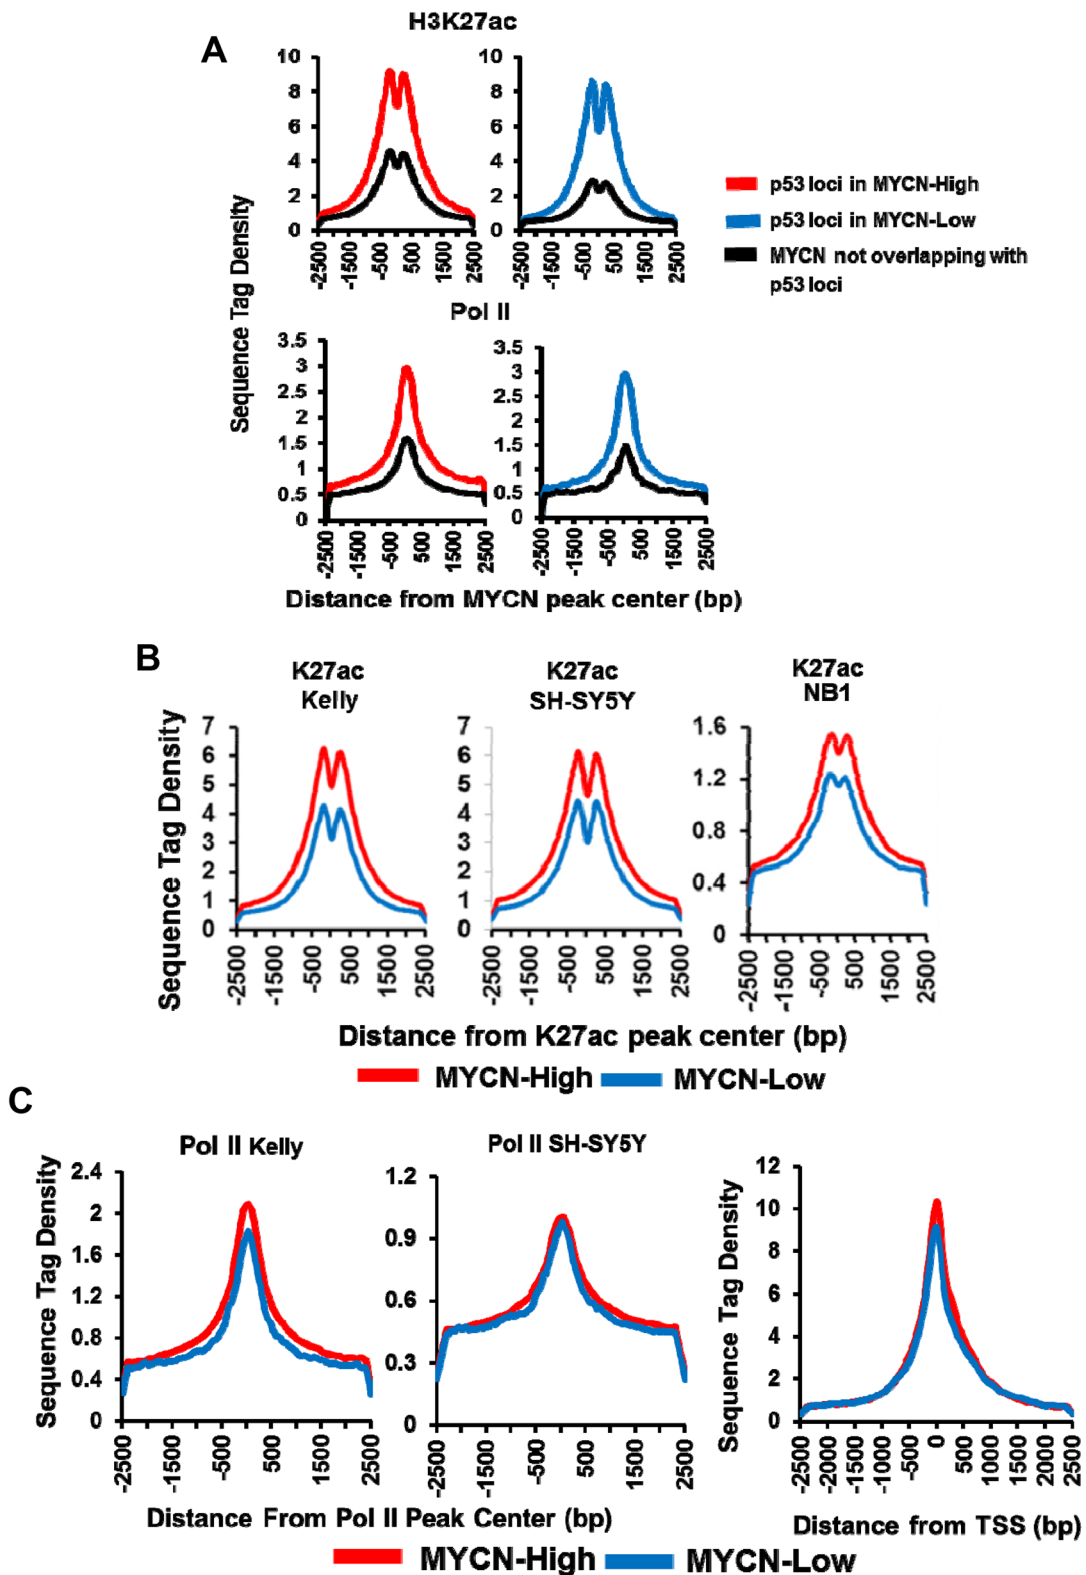

**Supplementary Figure 7:** (A) Meta-analysis of MYCN-ChIP-Seq datasets suggest a direct interaction between MYCN and p53 at actively transcribed genes. When at high levels, MYCN is found more frequently at transcription regulation sites, as indicated by H3K27ac binding. Meta-analysis of p53-ChIP-Seq binding data sets and MYCN-ChIP-Seq data showed that MYCN peaks overlap with p53-bound loci and are characterized by increased H3K27ac and Pol II. This observation suggests a direct interaction between MYCN and p53 at genes modulated by both transcriptional regulators. (B) High levels of MYCN were detected at transcription regulation sites, as indicated by H3K27ac binding. Datasets from the neuroblastoma cell lines Kelly, SH-SY5Y, and NB1 were analyzed. (C) Meta-analysis of MYCN-ChIP-Seq data for p53 sites with Pol II enrichment in the SH-SY5Y (MYCN-non-amplified) and Kelly (MYCN-amplified) neuroblastoma cell lines. Localization of MYCN binding peaks near TSS start sites of p53 target genes.

## MYCN levels do not alter MAX chromatin binding

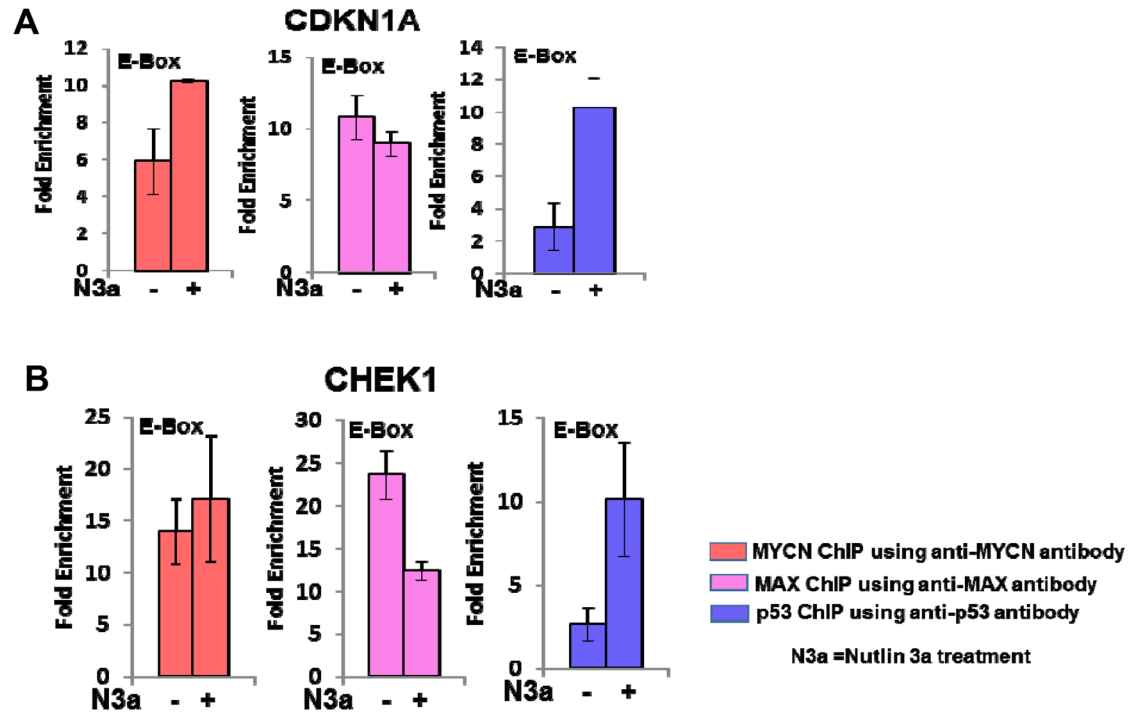

## MAX levels do not vary with MYCN levels in Neuroblastoma

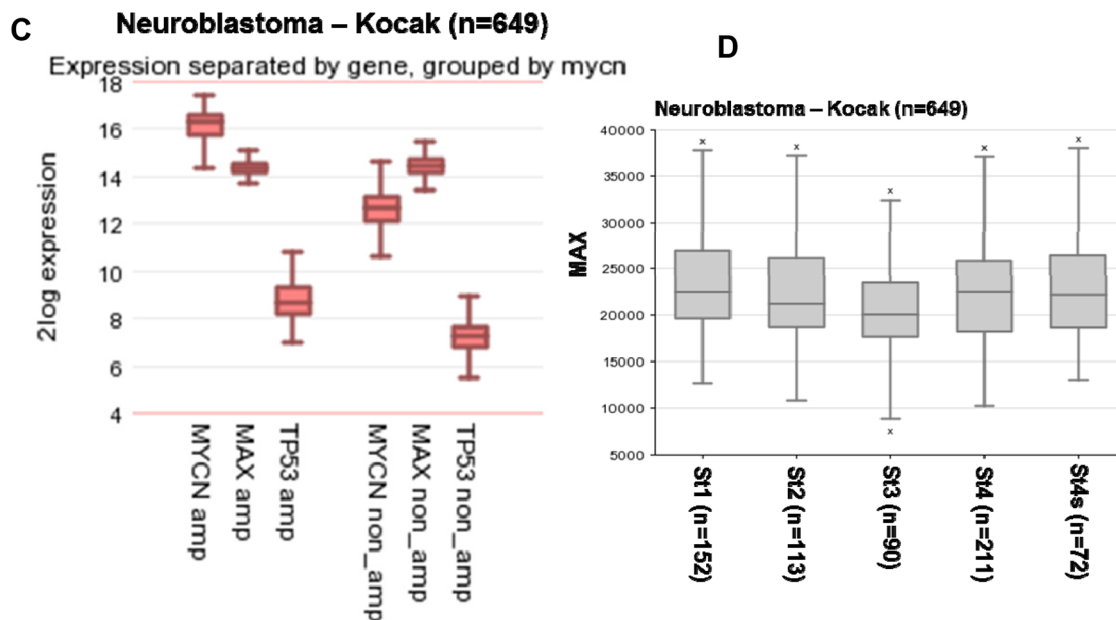

**Supplementary Figure 8: Chromatin immunoprecipitation for MYC, MAX and p53 at the CDKN1A and CHEK1 loci using the IMR-32 MYCN amplified cell line.** IMR-32 cells were not treated (control) or treated for 8h with 10  $\mu$ M Nutlin-3a. ChIP was performed for MAX, MYCN, and p53. The fold enrichment was normalized using inputs and negative controls. **(A)** CDKN1A gene has both E-boxes and p53-Res. **(B)** CHEK1 does not have a canonical p53RE and q-PCR is for the MYCN binding E-box. All genes were analyzed using Chip-qPCR with appropriate primers listed in Supplementary Table 1. N3a indicates Nutlin-3a treatment. These data suggest that p53 activation does not lead to increased MAX binding at the loci associated with a marked increase in p53 chromatin binding. **(C)** Analysis of MYCN, MAX and p53 levels in MYCN amplified and non-amplified neuroblastoma in a large well annotated data set of patients by RNA-seq. MYCN levels are 4 log higher on average while MAX levels are basically unchanged between MYCN amplified and non-amplified cases. **(D)** MAX levels are relatively constant among all neuroblastoma stages (INSS staging). R2: Genomics Analysis and Visualization Platform (<http://r2.amc.nl>).



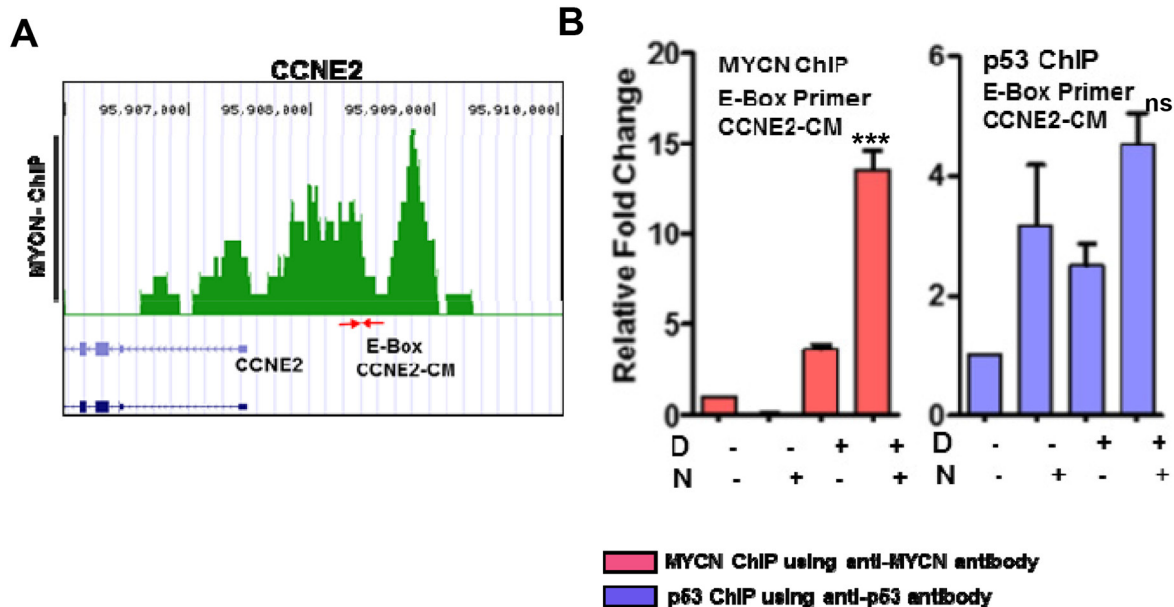

**Supplementary Figure 9: Details of MYCN and p53 ChIP for the CCNE2 gene.** (A) MYCN ChIP-seq data across the 5' region upstream of the CCNE2 gene. Consensus E-box is high-lighted in red. (B) ChIP results for MYCN and for p53 using primers for the across the CCNE2 e-box site, demonstrating enrichment for both MYCN and p53 binding suggesting that p53 may form a complex with MYCN at this site. ChIP-qPCR primers design and ChIP-qPCR assays are as detailed in results section and in Figure 6. D = doxycycline for MYCN induction, N = nutlin treatment for p53 activation (see text).

**Supplementary Table 1: Primers used in this study**

| Name <sup>1</sup>         | Sequence (5'-3')                             |
|---------------------------|----------------------------------------------|
| p21-CP-F                  | GATTGGCTTTCTGGCCGTCA                         |
| p21-CP-R                  | GGACAAAATAGCCACCAGCC                         |
| P21-CM-F                  | AGCTGGGTTAGGAACTTGGG                         |
| P21-CM-R                  | CGAAAACAAAACCGCTCGCA                         |
| SESN1-CP-F                | TCGAGGGGGGCATATCCACAG                        |
| SESN1-CP-R                | GGCAGAAAATGCTAAGCTGGG                        |
| SESN1-CM-F                | GCCCAGGTACCTCGTCCT                           |
| SESN1-CM-R                | GTACACGGCCCCCTTTGGC                          |
| CDC6-CM-F                 | CCCGCTTACCCAGAGTCG                           |
| CDC6-CM-R                 | GAACGGGGGAGGGAATCTAC                         |
| CHEK1-CM-F                | GGTCCGCCGTCCTTAAATCT                         |
| CHEK1-CM-R                | TCCAAAAGGGTGACGTGGAG                         |
| CCNE2-CM-F                | CCGGGATCCCAGAGGGTAA                          |
| CCNE2-CM-R                | TGGTGGCGATCTTTCTTCCC                         |
| pGEX2T p53 1-93 F         | AAGGATCCGAGGAGCCGCAGTCAGATCC                 |
| pGEX2T p53 1-93 R         | TTGAATTCAGGGGCCAGGAGGGGGCTGTGA               |
| pGEX2T p53 full-length F  | AAGGATCCGAGGAGCCGCAGTCAGATCC                 |
| pGEX2T p53 full-length R  | TTGAATTCGTCTGAGTCAGGCCCTTCTGTCTGA            |
| pGEX2T p53 1-363 F        | TGACGA TCTGCCTCGCGGTTTCG                     |
| pGEX2T p53 1-363 R        | AGCCCTGCTCCCCCTGGC                           |
| pGEX2T p53 FW 1-373 F     | CTTTTTGGACTTCAGGTGGCTG                       |
| pGEX2T p53 FW 1-373 R     | AGCCCTGCTCCCCCTGGC                           |
| pGEX2T p53 1-383 F        | GAGTTTTTTTATGGCGGGAGGTA                      |
| pGEX2T p53 1-383 R        | AGCCCTGCTCCCCCTGGC                           |
| PET22B MYCN Full-length F | TTTCATATGCCGAGCTGCTCCACGTCC                  |
| PET22B MYCN Full-length R | TTTAAGCTTGCAAGTCCGAGCGTGTTT                  |
| pGEX2T MYCN 1-88-F        | TTTGATCCATGCCGAGCTGCTCCACGTCCACCAT           |
| pGEX2T MYCN 1-88-R        | TTTGAATTCGCTCGTTCTCAAGCAGCATCTCCGTG          |
| pGEX2T MYCN 82-254-F      | TTTGAATCCCAGCTGGGTACGGAGATGCTGCT             |
| pGEX2T MYCN 82-254-R      | TTTGAATTCGTA CTGAGGGCCTTGTGGTCCGCC           |
| pGEX2T MYCN 248-362-F     | TTTGATCCGACCACAAGGCCCTCAGTACCTCCG            |
| pGEX2T MYCN 248-362-R     | TTTGAATTCACACTCTTGAGCGGACGTGGGGACG<br>CCTC   |
| pGEX2T MYCN 336-400-F     | TTTGATCCTCTCCCTACGTGGAGAGTGAGGATGC           |
| pGEX2T MYCN 336-400-R     | TTTGAATTCGCTGGACCGAAGGTCGTTGCGGCGC           |
| pGEX2T MYCN 400-464-F     | TTTGATCCAGCTTTCTCACGCTCAGGGACCACG<br>TG      |
| pGEX2T MYCN 400-464-R     | TTTGAATTCCTAGCAAGTCCGAGCGTGTCAATTTT<br>CTTTA |
| pGEX2T c-MYC-F            | TTTGATCCGATTTTTTTTCGGGTA                     |
| pGEX2T c-MYC-R            | TTTGAATTCCTACGCACAAGAGTTCCG                  |

<sup>1</sup>CP: ChIP p53; CM: ChIP MYCN.

**Supplementary Table 2: Correlation of neuroblastoma patient outcome with modulated genes**

See Supplementary File 1
